# Supplementary material for: Ecogenomics and cultivation reveal distinctive viral-bacterial communities in the surface microlayer of a Baltic Sea slick
Source: PubMed Central journal article supplement (PMC10507051; doi:10.1038/s43705-023-00307-8), 2023-09-18
Supplement: 43705_2023_307_MOESM1_ESM.pdf [file 43705_2023_307_MOESM1_ESM.pdf]

# Supplemental Material

## Ecogenomics and cultivation reveal distinctive viral-bacterial communities in the surface microlayer of a Baltic Sea slick

Janina Rahlff<sup>1\*</sup>, Matthias Wietz<sup>2,3</sup>, Helge-Ansgar Giebel<sup>4,#</sup>, Oliver Bayfield<sup>5</sup>, Emelie Nilsson<sup>1</sup>, Kristofer Bergström<sup>1</sup>, Kristopher Kieft<sup>6</sup>, Karthik Anantharaman<sup>6</sup>, Mariana Ribas-Ribas<sup>7</sup>, Hannah D. Schweitzer<sup>8</sup>, Oliver Wurl<sup>7</sup>, Matthias Hoetzinger<sup>1</sup>, Alfred Antson<sup>5</sup>, Karin Holmfeldt<sup>1</sup>

<sup>1</sup>Centre for Ecology and Evolution in Microbial Model Systems (EEMiS), Department of Biology and Environmental Science, Linnaeus University, Kalmar, Sweden

<sup>2</sup>Alfred Wegener Institute Helmholtz Centre for Polar and Marine Research, Bremerhaven, Germany

<sup>3</sup>Max Planck Institute for Marine Microbiology, Bremen, Germany

<sup>4</sup>Institute for Chemistry and Biology of the Marine Environment (ICBM), Carl von Ossietzky University of Oldenburg, Oldenburg, Germany

<sup>5</sup>York Structural Biology Laboratory, Department of Chemistry, University of York, York, United Kingdom

<sup>6</sup>Department of Bacteriology, University of Wisconsin-Madison, Madison, WI, USA

<sup>7</sup>Center of Marine Sensors (ZfMarS), Institute for Chemistry and Biology of the Marine Environment (ICBM), Carl von Ossietzky University of Oldenburg, Wilhelmshaven, Germany

<sup>8</sup>The Arctic University of Norway, Tromsø, Norway

#Present address: Center for Marine Sensors (ZfMarS), Institute for Chemistry and Biology of the Marine Environment (ICBM), Carl von Ossietzky University of Oldenburg, Schleusenstraße 1, 26382 Wilhelmshaven, Germany

\*Corresponding author: Janina Rahlff, E-Mail: [janina.rahlff@uol.de](mailto:janina.rahlff@uol.de)

**List of Supplementary tables (provided as one combined Excel file):**

Table S1: Sampling notes

Table S2a: Bacterial strains from slick SML isolated and sequenced in this study

Table S2b: Similarities of bacterial slick SML isolates to type strains based on digital DNA-DNA hybridization determined using the Type Strain Genome Server (<https://tygs.dsmz.de>)

Table S2c: KEGG numbers assigned to genes from slick SML isolates

Table S2d: Metabolic pathways in bacterial slick SML isolates, as reconstructed from predicted KEGG numbers.

Table S2e: Predicted genes encoding carbohydrate-active enzymes (CAZymes) in bacterial slick SML isolates. Genes encoding alginate and pectin degrading CAZymes are highlighted in red and blue, respectively.

Table S2f: Predicted biosynthetic genes in bacterial slick SML isolates.

Table S2g: Predicted biosurfactant-encoding genes in bacterial slick SML isolates.

Table S3a: CRISPRcasFinder (Couvin et al., 2018) output about evidence level 4 CRISPR arrays and associated consensus DR sequences

Table S3b: List of consensus direct repeat (DR) sequences used for spacer extraction and CRISPR array number they refer to

Table S4a: Information on metagenome-assembled genomes (MAGs), including assigned taxonomy, completeness, contamination, CRISPR repeat, CRISPR spacer to protospacer matches

Table S4b: MAG grouping based on high abundance in slick SML (Slick\_highAb), low abundance in slick SML (Slick\_lowAb), and high abundance in the underlying seawater (SSW).

Table S4c: KEGG numbers with significantly different fractions between MAG groups, displayed as relative fraction of all genes. Coloring illustrates the group with highest, significantly enriched fraction.

Table S4d: Predicted genes encoding carbohydrate-active enzymes (CAZymes) in MAGs.

Table S4e: Predicted biosurfactant-encoding genes in MAGs.

Table S5: Coverage output by iRep for dereplicated MAG set and SMS3

Table S6: CheckV (Nayfach et al., 2020) information on viral OTUs and viral clusters (VC) assigned by vConTACT2 (Bolduc et al., 2017) and compiled by graphanalyzer

Table S7: Virus enrichment (enrichment factor > 1) data corresponding to Fig. 6A. EF is a ratio of coverage in an SML sample divided by SSW counterpart. If a value is missing, it means that either the virus was absent in SML, SSW or both or that the value was 0.

Table S8a: Sum of coverage of viruses carrying an auxiliary metabolic gene (AMG) towards a certain pathway.

Table S8b: Info of AMG (KEGG orthology) detected on viral OTU; Only class I AMGs (Hurwitz et al., 2015) were considered.

Table S9: CRISPR spacer (from MAGs and slick SML bacterial isolates) to protospacer matches of Baltic Sea phage isolates and the viral populations from this study.

Table S10: Spacer matches to vOTUs at 100% similarity.

Table S11: Blastn results for direct repeat (DR)/array sequences shown in Fig S14.

Table S12a: Summary of viral strain variant clusters (micro-diversity) based on analysis with inStrain (Olm et al., 2021). A singleton refers to a variant that was solely detected in that sample. "All-in-one" variants are variants of vOTUs that were detected in all of the compared samples.

Table S12b: Viral strain variant clusters (micro-diversity) of all 12 metagenomes based on analysis with inStrain (Olm et al., 2021)

Table S12c: Viral strain variant clusters (micro-diversity) in slick SML based on analysis with inStrain (Olm et al., 2021)

Table S12d: Viral strain variant clusters (micro-diversity) in non-slick SML based on analysis with inStrain (Olm et al., 2021)

Table S12e: Viral strain variant clusters (micro-diversity) in slick SSW based on analysis with inStrain (Olm et al., 2021)

Table S12f: Viral strain variant clusters (micro-diversity) in non-slick SSW based on analysis with inStrain (Olm et al., 2021)

Table S12g: Viral strain variant clusters (micro-diversity) in particle-associated (PA, > 5 µm pore-size filtered) samples based on analysis with inStrain (Olm et al., 2021)

Table S12h: Viral strain variant clusters (micro-diversity) in free-living (FL, 5 - 0.2 µm pore size filtered) samples based on analysis with inStrain (Olm et al., 2021)

Table S12i: Viral strain variant clusters (micro-diversity) in viral (<0.2 µm pore size filtered) samples based on analysis with inStrain (Olm et al., 2021)

Table S13: Head and tail measurements of phage isolates according to protocol Brum (2011).

Table S14: Functional annotations/output of DRAMv (Shaffer et al., 2020) for 428 vOTUs, lytic phage isolates and *Alishewanella* sp. (SMS8) prophage

Table S14: Viral strain variant clusters

Table S15: Accession numbers for Bioproject PRJNA855638: Prokaryotes and viruses from sea-surface microlayer of a brackish surface slick

## Supplementary results:

### Host range experiment

Plaque assays of the two lytic *Alishewanella* phage vB\_AspM\_Slickus01 and vB\_AspM\_Slicko01 and *Pseudoalteromonas tunicata* phage vB\_PtuP\_Slicky01 were performed on host strains *P. tunicata* SMS2, *Rheinheimera baltica* SMS3, SMS4, SMS11, and SMS12, as well as *Alishewanella* sp., SMS8, SMS9. This was conducted to test for cross-infection due to the phylogenetic relatedness of *Alishewanella* sp., *P. tunicata* and *Rheinheimera baltica* and due to the observation of spacers from different Gammaproteobacteria targeting the same vOTU, and spacers from gammaproteobacterial MAGs such as *Paraglaciecola* having spacer to protospacer matches to Barbaviruses that were isolated on *R. baltica*. In addition, Slickus, Slicko and Slicky possess tRNAs, and tRNAs can have a role in cross-infectivity, at least for cyanobacterial hosts [1].

Overnight cultures of the bacterial strains were used for the plaque assays. Bacteria (300 µl) were mixed with 3.5 ml top-agar and spread on Zobell agar. Ten-times dilutions of phages until  $10^{-7}$  were produced in 1.5 ml tubes and 10 µl were spotted on Zobell agar plates containing the solidified bacteria and top-agar mix. Clearing of the bacterial lawn by phage lysis (plaques) or bacterial inhibition was investigated after 48 hours. As a result, we did not find any cross-infection in a host range assay where the phages were tested on the above-mentioned bacterial isolates. *Alishewanella* phage vB\_AspM\_Slickus01 and vB\_AspM\_Slicko01 only infected *Alishewanella* sp. SMS8, and vB\_PtuP\_Slicky01 only *P. tunicata* SMS2.

### Relative abundance (Fig. 2)

The family *Chromatiaceae* comprises *Alishewanella* sp. and *R. baltica*, which are phylogenetically closely related species [2]. Since *Alishewanella* sp. from the slick SML is likely a new species (see below) with no reference genome in the database of the tool we used for taxonomic profiling, *Alishewanella* sp. has been overseen or falsely taken as *R. baltica*, as

from 17.8 % relative abundance of *Chromatiaceae*, 17.1 % were *R. baltica*, although *Alishewanella* sp. was ~10 x more abundant based on further investigations (see main text, Table S5). This is the reason why we report taxonomy at family level in this case.

### **CRISPR system of *P. tunicata* SMS2:**

Two different evidence level 4 CRISPR arrays associated with two different consensus DR sequences (Table S2a) were detected on *P. tunicata* SMS2 by using CRISPRcasFinder [3]. The DR sequence of Array 1 “GTGAACTGCCGAGTAGGCAGCTGAAAAT” equipped with 10 spacers and Array 2 “TTTCTAAGCTGCCTGTGCGGCAGTGAAC” equipped with 36 spacers corresponded to DR186/P64 and DR54/P26 recovered from assemblies (Table S3b), respectively. Array 2 (position 78-2265 nt) was flanked by four genes, namely *cmr6*, *cmr5*, *cmr4* and *cmr1* of the Cas RAMP module (Cmr) effector complex belonging to Cas Type IIIB system and were detected on the same scaffold (position 3770-10512 nt) as Array 2. On three other scaffolds, Cas clusters for Cas3 (4 genes) and Cas3a (2 genes) of a Type I CRISPR system were found. Thomas, et al. [4] reported only one consensus DR sequence “GTTCACTGCCGCACAGGCAGCTCAGAAA” for *P. tunicata* in conjunction with Cas 1, 3 and 4 (typical of Type I CRISPR systems) as well as two unknown Cas homologs. The DR sequence of [4] differs only by one point mutation from the Array 2 DR sequence in reverse complement. Spacers extracted from metagenome reads based on the DR sequence from Array 2 “TTTCTAAGCTGCCTGTGCGGCAGTGAAC” (P26) and matching them to the virome of 428 OTUs revealed spacer matches to the two *Shewanella* sp. phage 1/41-related 34.1 kb vOTU and 40.7 kb vOTU in the slick SML, while a spacer recovered from Array 1 of *P. tunicata* SMS2 matched a 34.8 kb vOTU from the slick SML, which was related to *Pelagibacter* phage HTVC023P based on shared protein clusters (Table S6). Our results support that CRISPR systems for slick SML derived *P. tunicata* SMS2 are more complex than previously reported by using the Cas machinery of different CRISPR system types, and because the CRISPR-Cas

Type III B system can use both DNAs and RNAs as substrates for spacer acquisition (reviewed by Zhang and An [5]). Type III systems are rather uncommon in Gammaproteobacteria (reviewed by Makarova, et al. [6]).

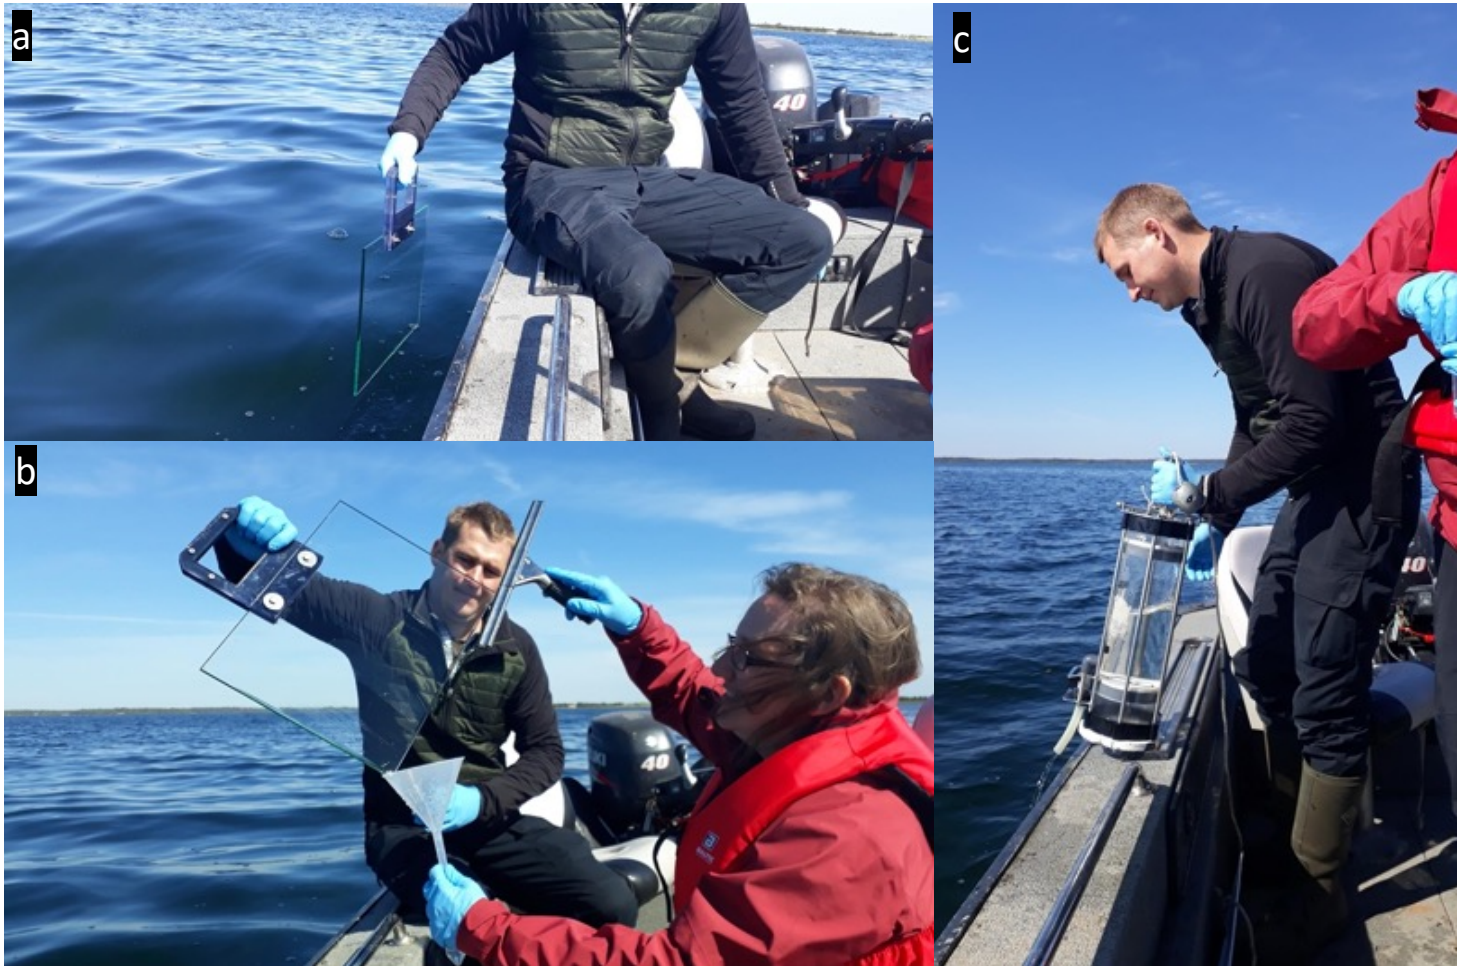

**Fig. S1:** Field sampling of surface microlayer (SML) with the glass plate sampler. Lowering of the glass plate for its immersion (a) and wiping off SML from the plate into a funnel inserted in a sampling bottle (b). Sampling of underlying water with a Ruttner sampler (c).

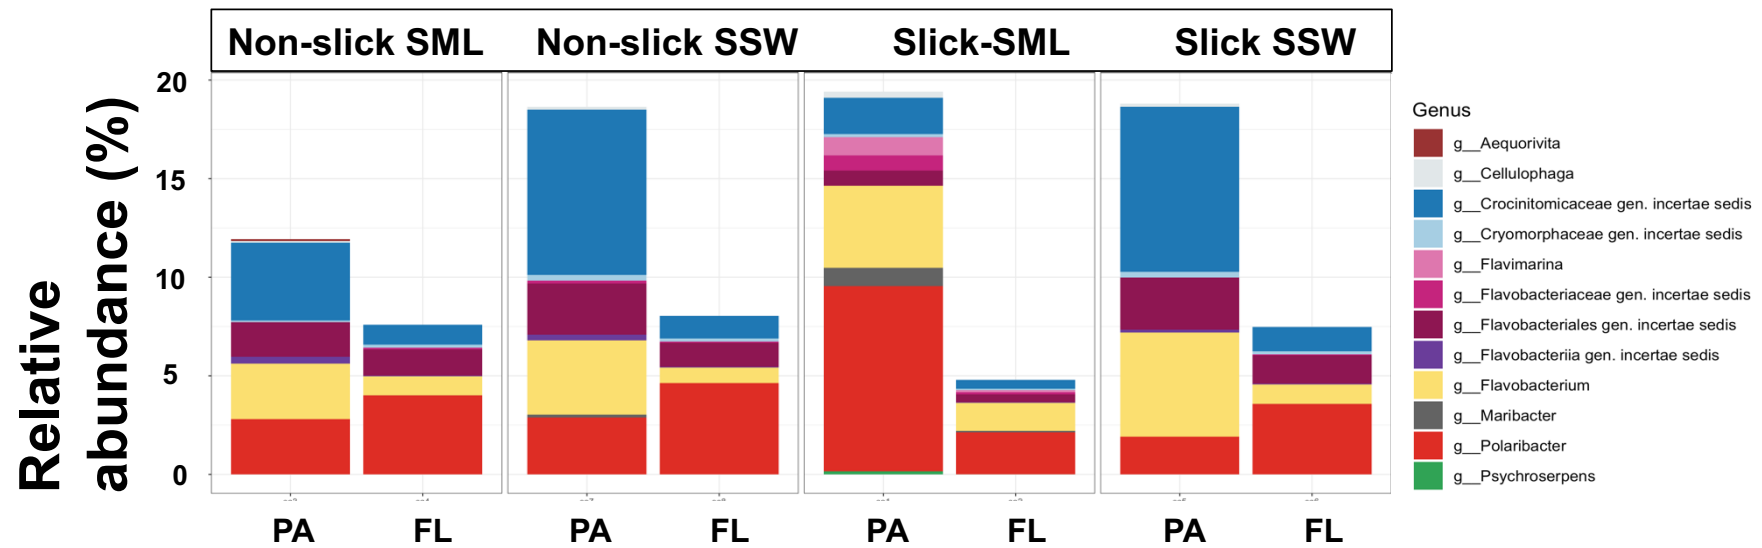

**Fig. S2:** Relative abundance of class *Flavobacteriia* based on results from *mOTUs*. *FL* = free-living fraction (5 - 0.2  $\mu\text{m}$  pore size filtered), *PA* = particle-associated fraction (> 5 $\mu\text{m}$  filtered), *SML* = sea-surface microlayer, *SSW* = subsurface water.



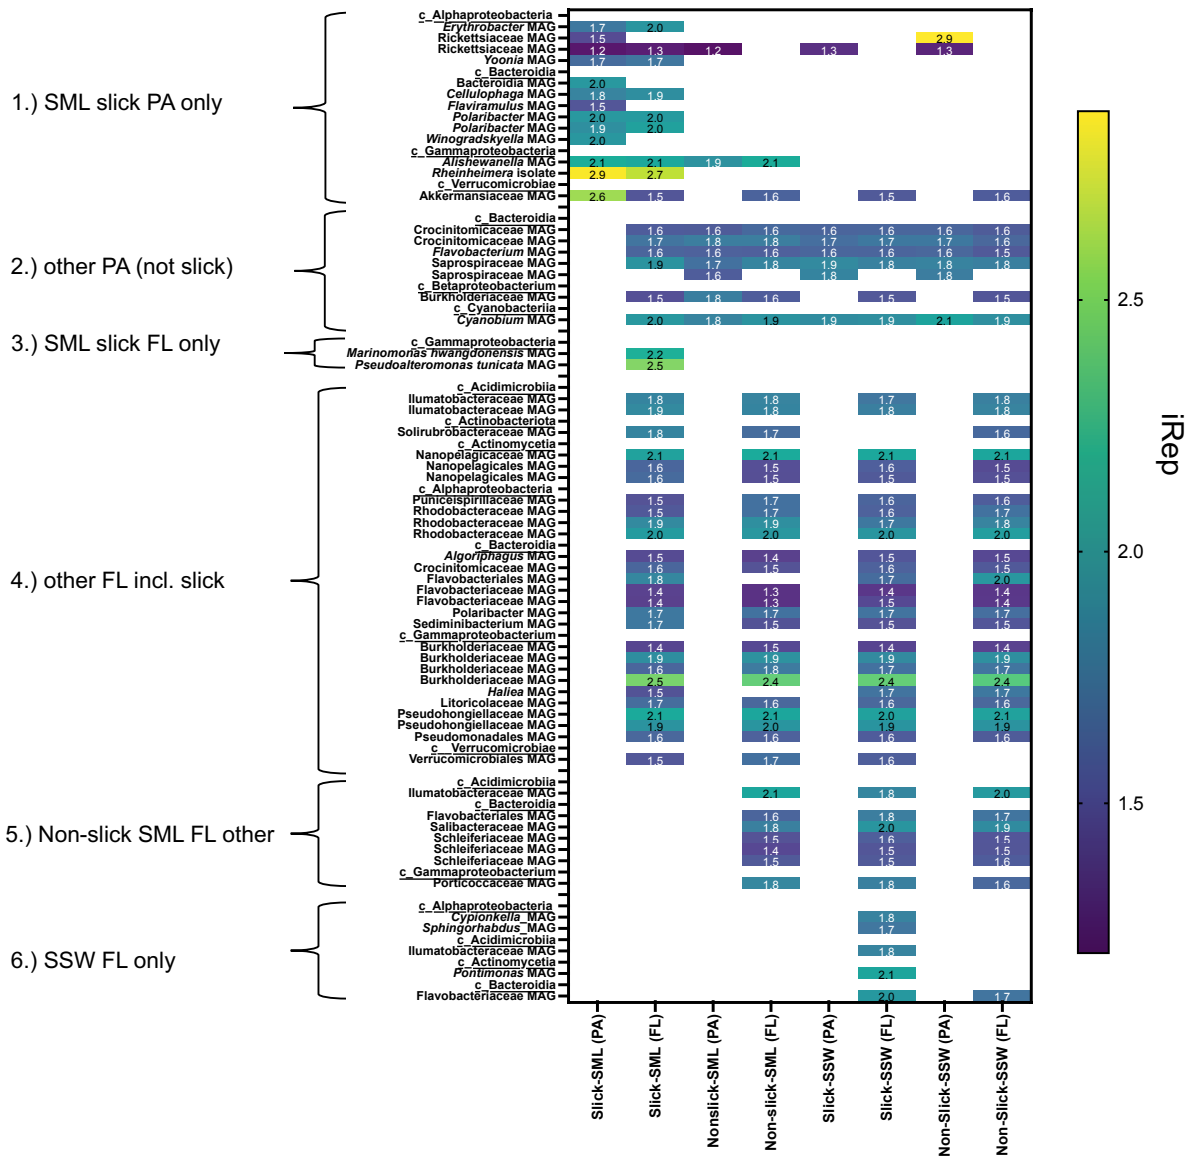

**Fig. S3:** Groups of actively replicating bacteria based on index of replication (*iRep*). We defined six groups according to samples, in which replicating bacteria were detected, e.g. "SSW FL only" contains MAGs with *iRep* in the SSW FL fraction only. Blank fields indicate that *iRep* values could not be predicted within the defined thresholds. An *iRep* value of 2 indicates that the coverage at the origin of replication is double the coverage at the terminus. This could be achieved if half of the population was in process of two simultaneous replication events or each cell of the population had started one replication. FL = free-living fraction (5 - 0.2  $\mu\text{m}$  pore size filtered), PA = particle-associated fraction (>5 $\mu\text{m}$  filtered), SML = sea-surface microlayer, SSW = subsurface water

**a**

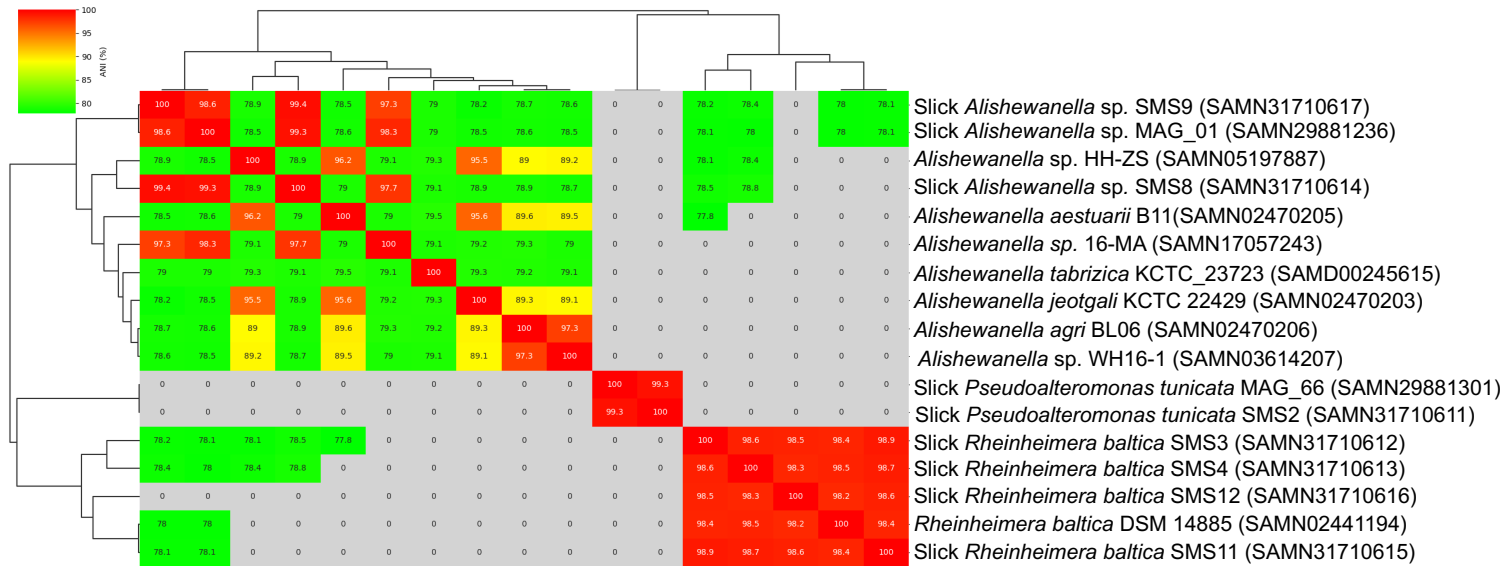

**b**

| Average nucleotide identity (ANI) and aligned fraction to Slick <i>Alishewanella</i> sp. SMS8 (SAMN31710614) |          |             |              |            |
|--------------------------------------------------------------------------------------------------------------|----------|-------------|--------------|------------|
| Genome                                                                                                       | ANiB [%] | Aligned [%] | Aligned [bp] | Total [bp] |
| Slick <i>Alishewanella</i> sp. SMS9 (SAMN31710617)                                                           | 99.39    | 58.43       | 2086875      | 3571747    |
| Slick <i>Alishewanella</i> sp. MAG_01 (SAMN29881236)                                                         | 99.16    | 84.74       | 3026788      | 3571747    |
| <i>Alishewanella</i> sp. 16-MA (SAMN17057243)                                                                | 97.24    | 88.91       | 3175681      | 3571747    |
| <i>Alishewanella tabrizica</i> KCTC_23723 (SAMD00245615)                                                     | 74.08    | 61.9        | 2211085      | 3571747    |
| <i>Alishewanella</i> sp. WH16-1 (SAMN03614207)                                                               | 72.92    | 59.61       | 2129233      | 3571747    |
| <i>Alishewanella agri</i> BL06 (SAMN02470206)                                                                | 72.88    | 60.48       | 2160152      | 3571747    |
| <i>Alishewanella</i> sp. HH-ZS (SAMN05197887)                                                                | 72.74    | 58.26       | 2080864      | 3571747    |
| <i>Alishewanella aestuarii</i> B11(SAMN02470205)                                                             | 72.7     | 58.29       | 2082122      | 3571747    |
| <i>Alishewanella jeotgali</i> KCTC 22429 (SAMN02470203)                                                      | 72.69    | 58.91       | 2104109      | 3571747    |
| Slick <i>Rheinheimera baltica</i> SMS12 (SAMN31710616)                                                       | 71.04    | 47.5        | 1696542      | 3571747    |
| Slick <i>Rheinheimera baltica</i> SMS4 (SAMN31710613)                                                        | 71.01    | 52.13       | 1862029      | 3571747    |
| Slick <i>Rheinheimera baltica</i> SMS11 (SAMN31710615)                                                       | 70.85    | 51.87       | 1852563      | 3571747    |
| Slick <i>Rheinheimera baltica</i> SMS3 (SAMN31710612)                                                        | 70.84    | 51.78       | 1849277      | 3571747    |
| <i>Rheinheimera baltica</i> DSM 14885 (SAMN02441194)                                                         | 70.75    | 50.21       | 1793325      | 3571747    |
| Slick <i>Pseudoalteromonas tunicata</i> SMS2 (SAMN31710611)                                                  | 66.47    | 26.92       | 961342       | 3571747    |
| Slick <i>Pseudoalteromonas tunicata</i> MAG_66 (SAMN29881301)                                                | 66.34    | 26.21       | 936297       | 3571747    |

**Fig. S4:** Slick SML *Alishewanella* sp. form a distinct bacterial cluster. Average nucleotide identity (ANI) comparison for *Rheinheimera baltica* isolates, *Pseudoalteromonas tunicata* isolate, *Alishewanella* sp. isolates and MAG assigned to *Alishewanella* including relevant reference genomes with Biosample number mentioned alongside. As FastANI does not output ANI much smaller than 77%, we investigated further for the comparison of *Alishewanella* sp. SMS8 and *R. baltica* and *P. tunicata* strains using ANIb analysis from JWSpeciesWS web server [7] with results and alignment fractions reported in the table.

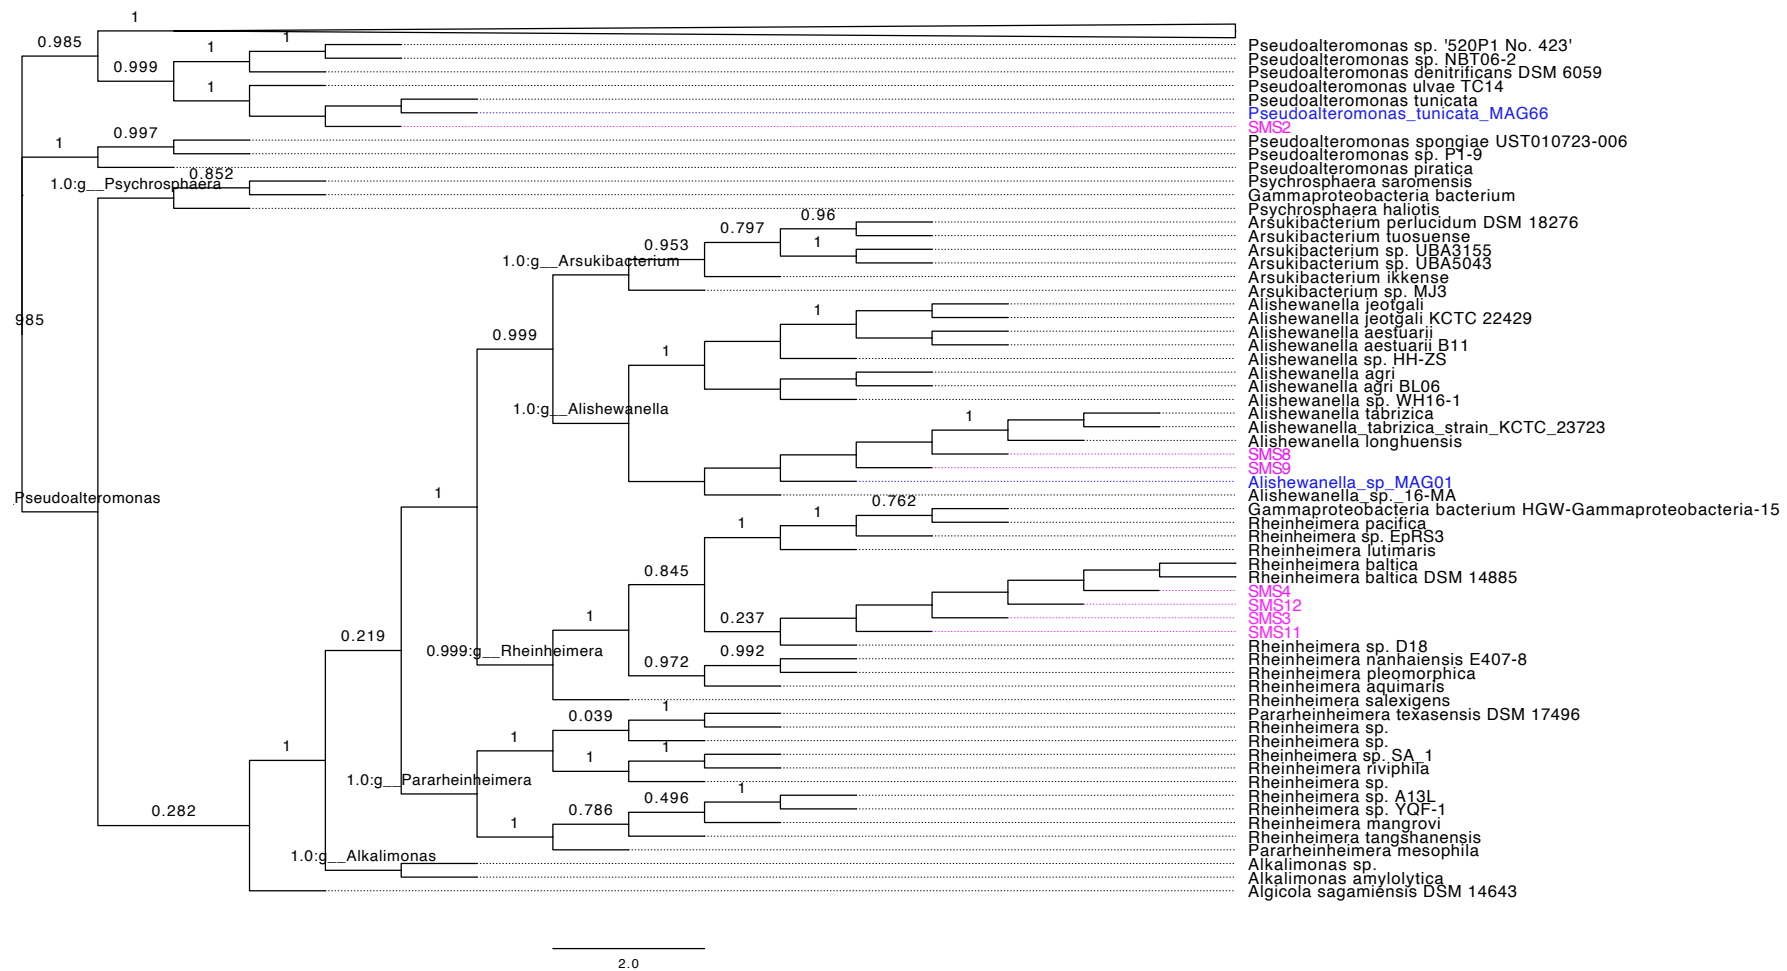

**Fig. S5:** Phylogenetic relatedness of SML isolates (pink) and respective MAGs (blue) within the *bac120.classify.tree* (identification uses 120 bacterial marker genes) predicted by the *classify\_wf* in *GTDB-Tk* [8] (settings explained in the main text), which uses *pplacer* v.1.1 [9] to find the maximum-likelihood placement of genomes in the tree. A subnetwork of the full tree was extracted in *Dendroscope* v.3.8.5. [10], and the tree was rooted at the midpoint and tips aligned in *FigTree* v.1.4.4. [11].

**a**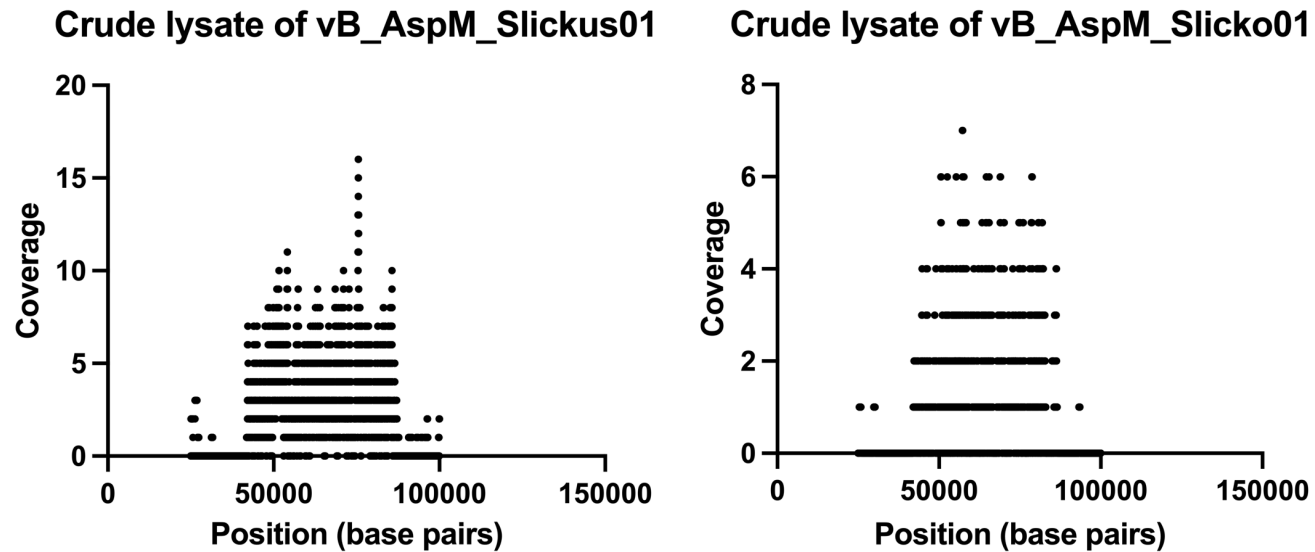**b**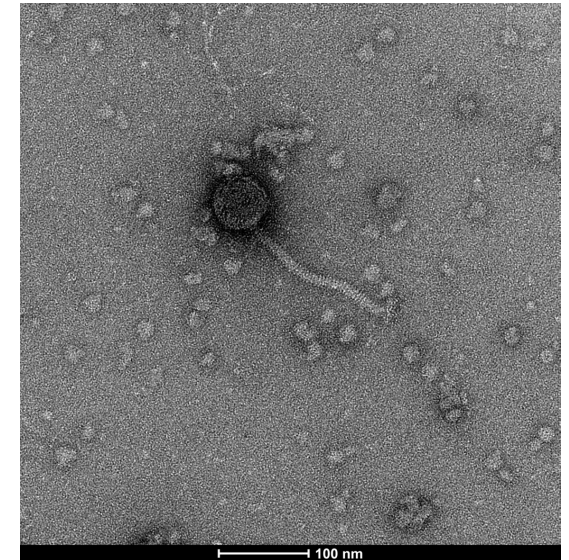

**Fig. S6:** A 50 kb-prophage from the *Alishewanella* sp. isolate SMS8 positioned between 36371 and 86348 bp in the genome's scaffold shows induction (high coverage) based on mapping of reads from the crude lysates of *Alishewanella* phage vB\_AspM\_Slickus01 and vB\_AspM\_Slicko01 to the prophage-containing scaffold of SMS8 (**a**). In transmission electron microscopy, a siphovirus structure among the lytic myovirus-like morphologies in the crude lysate of vB\_AspM\_Slicko01 was detected, potentially representing the 50 kb-prophage (**b**).

### **Additional results prophage:**

The 50 kb prophage carries a tape tail measure protein of 1178 bp length (see below). According to Hoetzing, et al. [12], the amino acid sequence length of the tape measure protein can be converted to tail length using the formula  $y = 14 + 0.144 * x$ , where  $x$  is the length of the tape measure protein (number of amino acids), which in case of the 50 kb prophage converts to a tail length of 183.6 nm. ImageJ gives a tail length of 169.4 nm for this prophage, which is reasonably comparable to the calculation. According to the linear regression presented by Hoetzing, et al. [12], the chance of a phage having siphovirus morphology with a tape measure sequence  $> 1000$  bp is high. Most prophages have siphovirus morphology, and the capsid diameter of  $\sim 65$  nm is also consistent with the genome size of 50 kb according to [13]. The prophage has 68 open reading frames. Functional annotations of the genes revealed presence of lysogeny related proteins (two integrases, regulatory CII family protein), structural proteins (baseplate, two capsid proteins, tape measure protein), DNA processing, repair and replication proteins (single-strand DNA-binding protein, exonuclease, DNA replication protein DnaC, transcriptional repressors), DNA packaging (terminases, portal protein), nucleotide metabolism (thymidylate synthase) and catalytic proteins (lysozyme, permuted papain-like amidase) (Table S14). The prophage got targeted by CRISPR spacers extracted from reads of the slick SML and the non-slick SML sample, but not from the SSW (Fig. 8C, main manuscript).

>NG\_32195\_SMS8\_spades\_3\_length\_559453\_cov\_168\_fragment\_1\_53 rank: D; Tape measure protein [PF20155.2] (db=pfam)

MSVKQKFIDLVLRGKDLFPTASAASDELKKLQAESKTTSEEMRKLEQAQAQVAKA  
QGLELFAKQAELALAGAREEVTRLAREMDASDRPTKEQSEALKLATRSASQLQTEY  
NKLQSQLSRKTELQQSGVNTANLASEQDRLQREVKESANALNEKRTKLRRLSDM  
DTTEKSTGKFGGLRGLTTRLAAFAAAYVGINQLRSALTAIFTTGDKFEKLDIQLTGI  
MGSIQAGEQASAWIKDFAKNTPLQLDQVTETFFVRLKNFGLDPMGAMQAIIDQSEKL  
GGGYERVQGISLALGQAWAKQKLQGEEILQLIERGVPVWQLLENTGKNTAELQRL  
SSAGELGRDTIKQLIDEIGRSAEGSAAKGMSTLSGLVSNARDNFDQFFNLVATSGALD  
WLKNQLDSLNTMAEMAASGELQELAKNISDGIVATAEAVKSLVTTIYEWRGAITA  
VGAVWATLKVGSFLADLSKGTLDAIRNLTVLVTTKKGVEIANGKLASSFGPLIGAIRG  
GIGAVSDWMKGLSGVGGLLAKGGIFAGIAYGVYEIGRLAKAWLDLREAERALNESR  
GEASITNSMVNEELAAINDQLNSNYTSLKEVIAAEEAGQIVREQSTGIWRRNTEEIGR  
NTDYLLGHGYALTDSITAIEEAYKSLGLQSTKSLEEAAEASRKAYEVIASGQEPQEQQR  
AAFLKYADAANKAAQATGESISDSIKATAANLGLTDSLDKLTGANSKSQVAATEQSK

AMSGASAELAKTKSAIDYRKTLDSTTASSEKALAAQQLADAEASLTEQTRRLNEI  
KEVEAATYTKLQAKLAEYTQQMQALDELYKADGISAQEYIAQRERYAEVVGIIQRM  
LAGLGDGEQKVKEDTDSANLSLAEQQQLDDLAESSGTATRYISLLANAQQALKTEF  
NLTDQTTEDLNKRLNELNGFIVQNNRVTNIIWWRELAQASNEAFEREKLIIRETMAMR  
GYIQLGSASLSMAELAQVTKAVDRGFTSLGDNDMAVLRQAITDAENRLLSFRDELE  
GTVSSLQDELDRNLNDNQAIEKRAYEQQTAELRAKLAAAQASGDAASIAAAKEALK  
LADQIYKTKQAQYAEELKANSKTTNTSSPSSAANNVTPLVRQTTPTSNTVLPPTTASS  
TRTVRLVLELQGQSYNADMSISAADQLLAQIERARSTSL\*

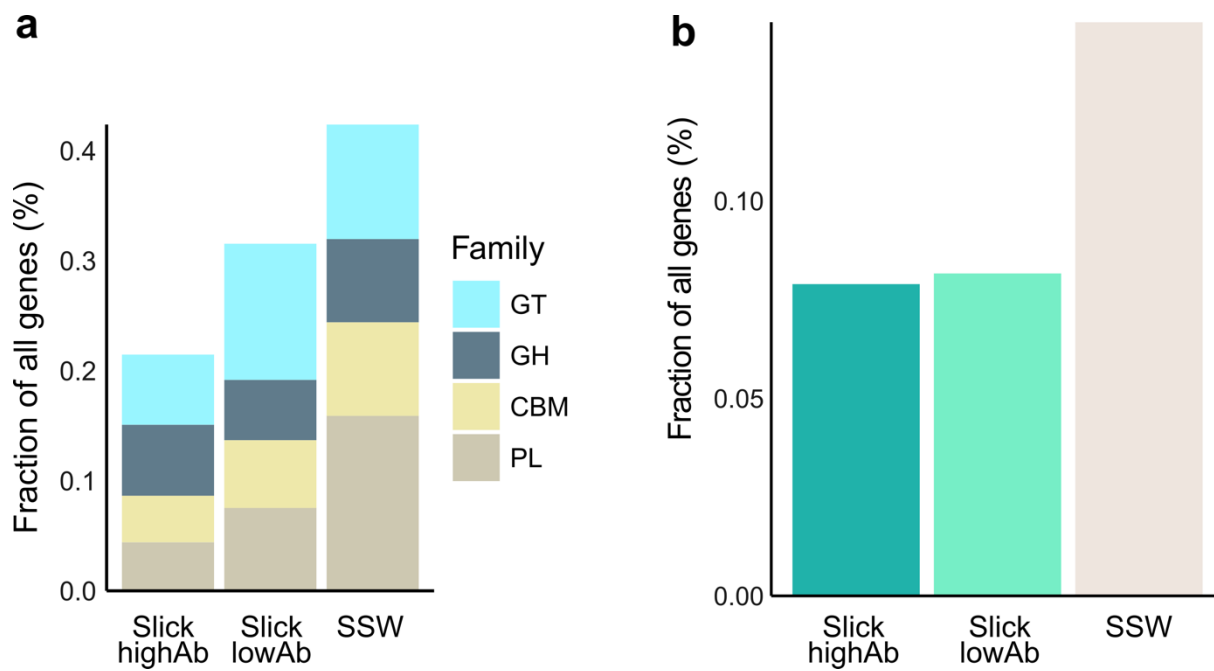

**Fig. S7:** Fraction of CAZyme (a) and surfactant-encoding genes in MAG types (b), displayed as percent of all encoded genes.



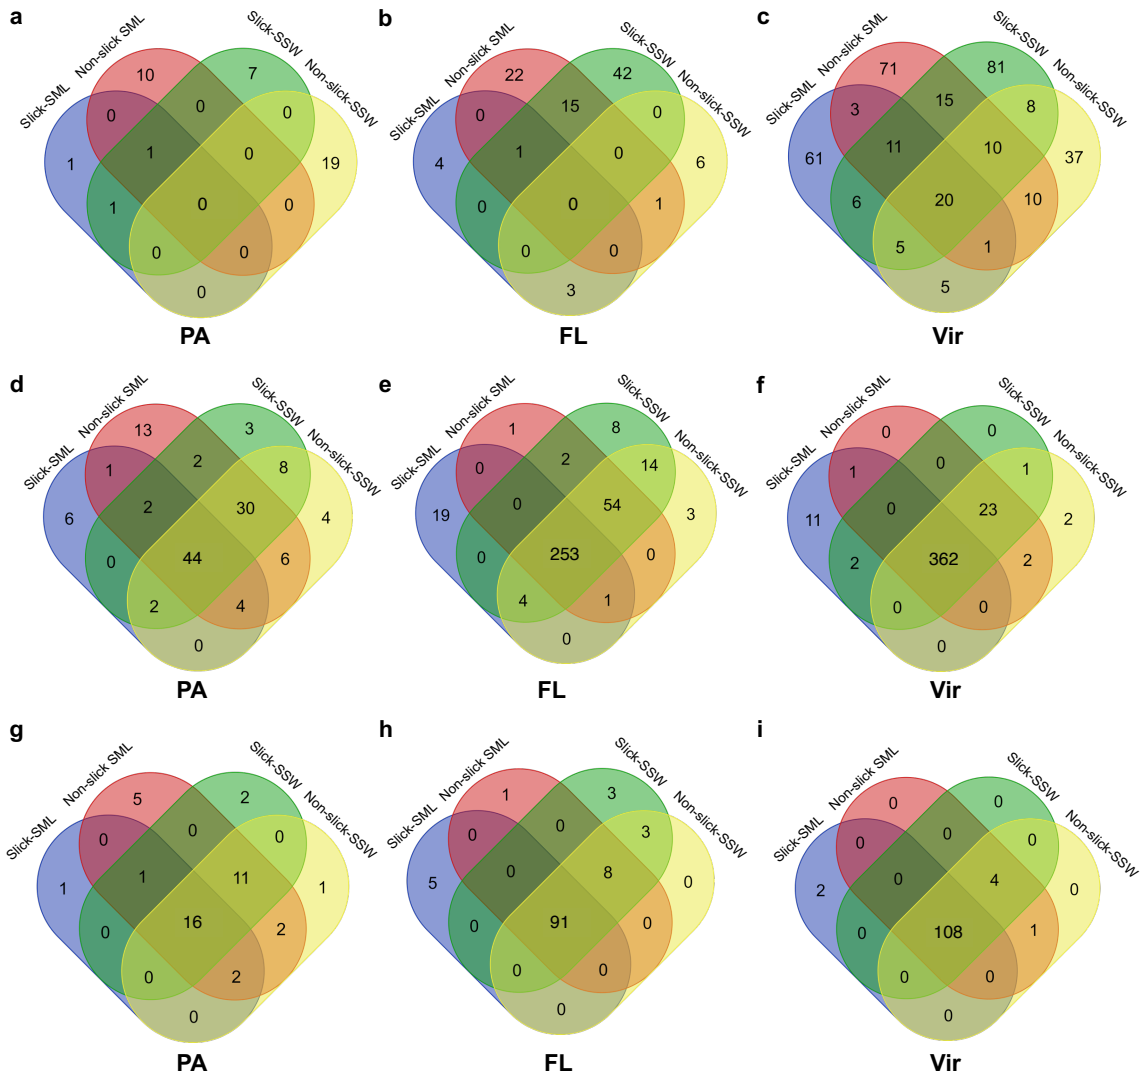

**Fig. S8:** Shared vOTUs in viral ( $<0.2 \mu\text{m}$ ), free-living (FL:  $0.2 - 5 \mu\text{m}$ ), particle-associated fraction (PA:  $>5 \mu\text{m}$ ) for the four sample types. Venn diagrams are based on origin of assembled virus (a-c), presence of vOTUs based on read-mapping (d-f), and presence of viral clusters (VCs) based on read-mapping (g-i). If counts do not add up to 428 (= total number of viral populations detected in this study), this is because not all viruses are found in each fraction. Venn diagrams were constructed using Ugent webtool: <https://bioinformatics.psb.ugent.be/webtools/Venn/>. SML = sea-surface microlayer, SSW = subsurface water.

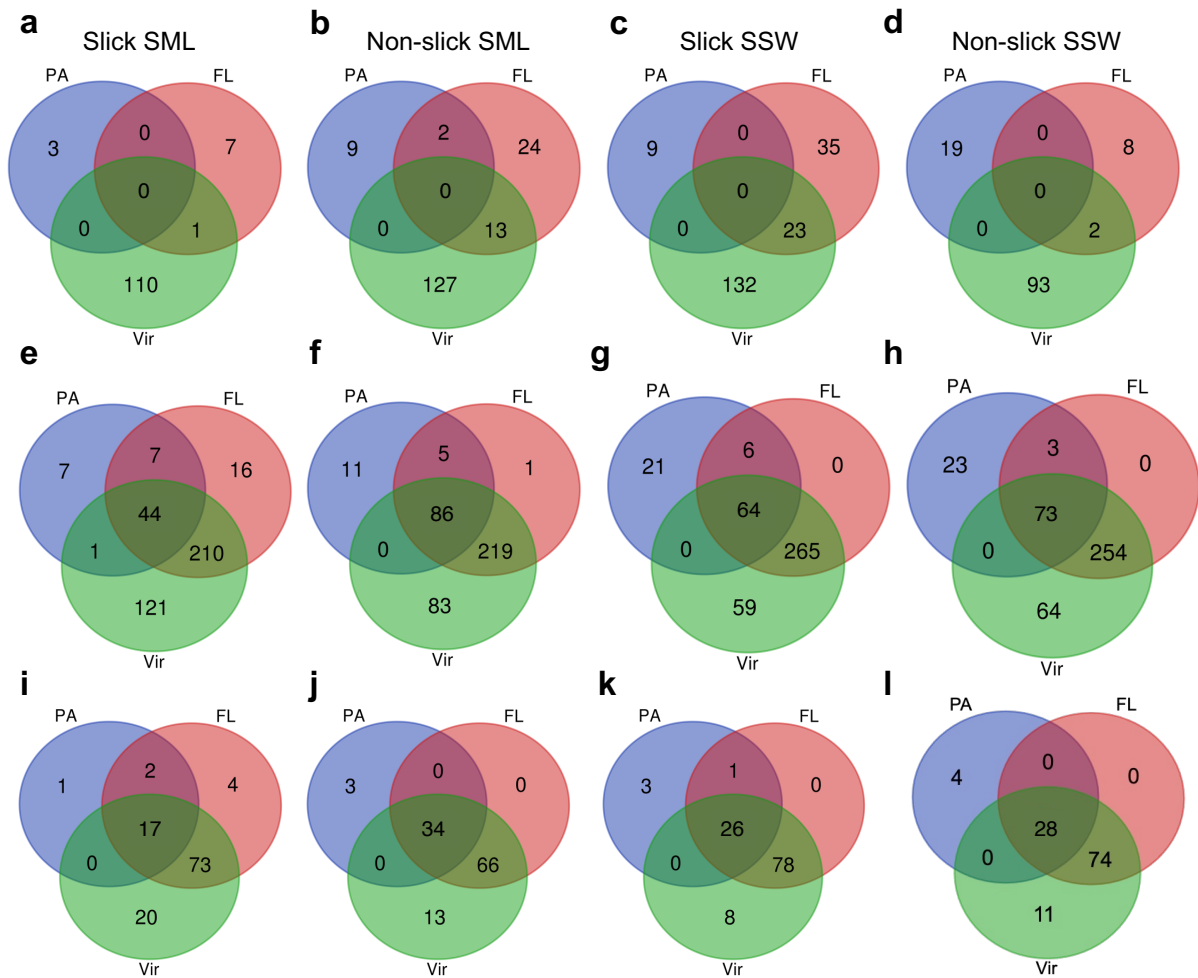

**Fig. S9:** Shared vOTUs in slick SML, non-slick SML, slick SSW, and non-slick SSW for the different pore size fractions. Venn diagrams are based on origin of assembled virus (**a-d**), presence of vOTUs based on read-mapping (**e-h**), and presence of viral clusters (VCs) based on read-mapping (**i-l**). If counts do not add up to 428 (= total number of vOTUs detected in this study), this is because not all viruses are found in each fraction. Venn diagrams were constructed using Ugent webtool: <https://bioinformatics.psb.ugent.be/webtools/Venn/>. FL = free-living (0.2 – 5  $\mu\text{m}$ ), PA = particle-associated fraction (> 5  $\mu\text{m}$ ), SML = sea-surface microlayer, SSW = subsurface water.

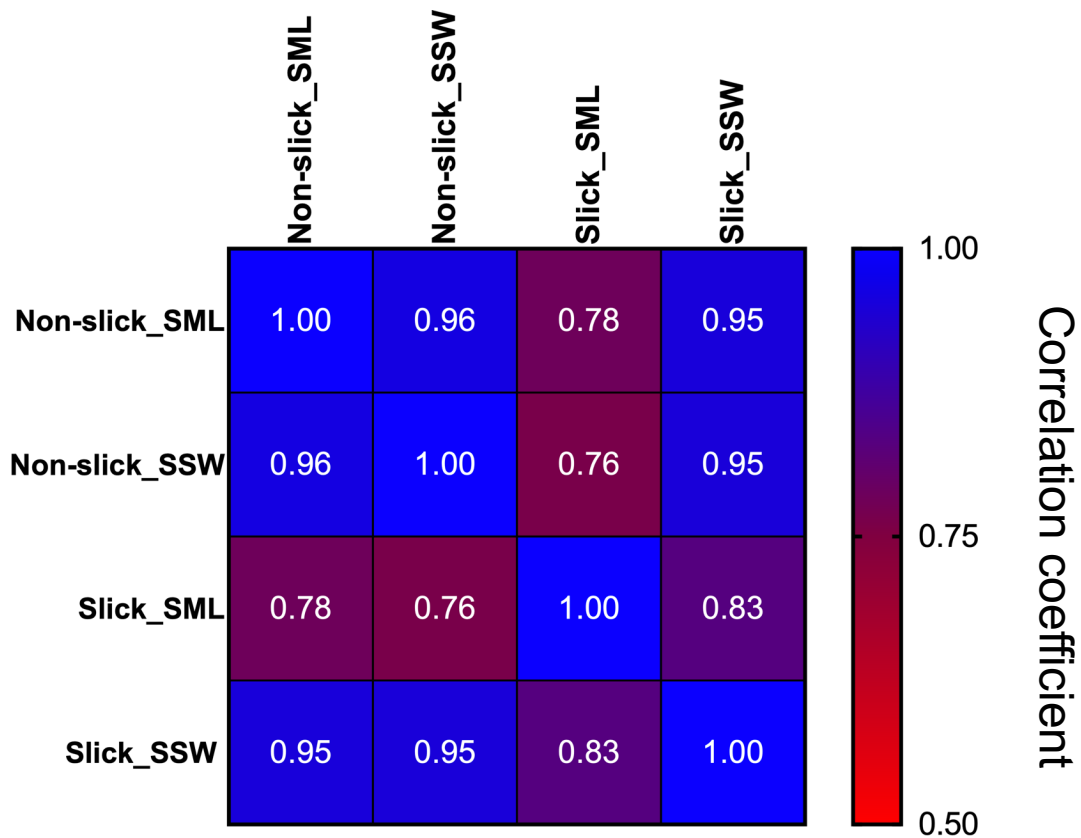

**Fig. S10:** Correlation matrix based on read-normalized coverage for 428 viral operational taxonomic units (vOTUs) for the viral fraction ( $< 0.2 \mu\text{m}$ ) of the samples. Shown is Spearman's  $R$  as correlation coefficient. Correlation was performed in GraphPad Prism version 9. SML = sea-surface microlayer, SSW = subsurface water.

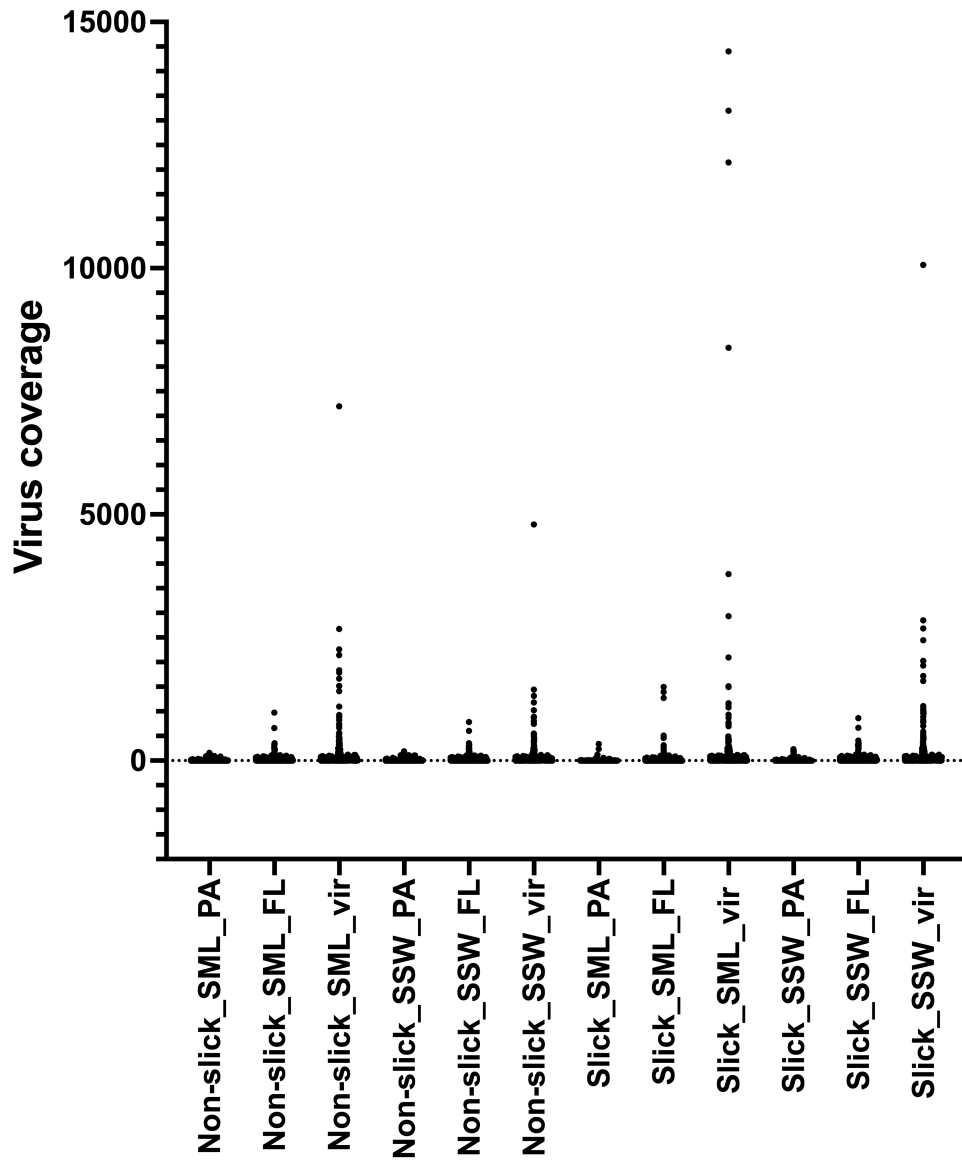

*Fig. S11: Virus coverage normalized to read depth across different samples and filtered fractions with vir ( $< 0.2 \mu\text{m}$ ), free-living bacterial fraction (FL:  $0.2 - 5 \mu\text{m}$ ), particle-associated fraction (PA:  $> 5 \mu\text{m}$ ), SML=sea-surface microlayer, SSW=subsurface water*

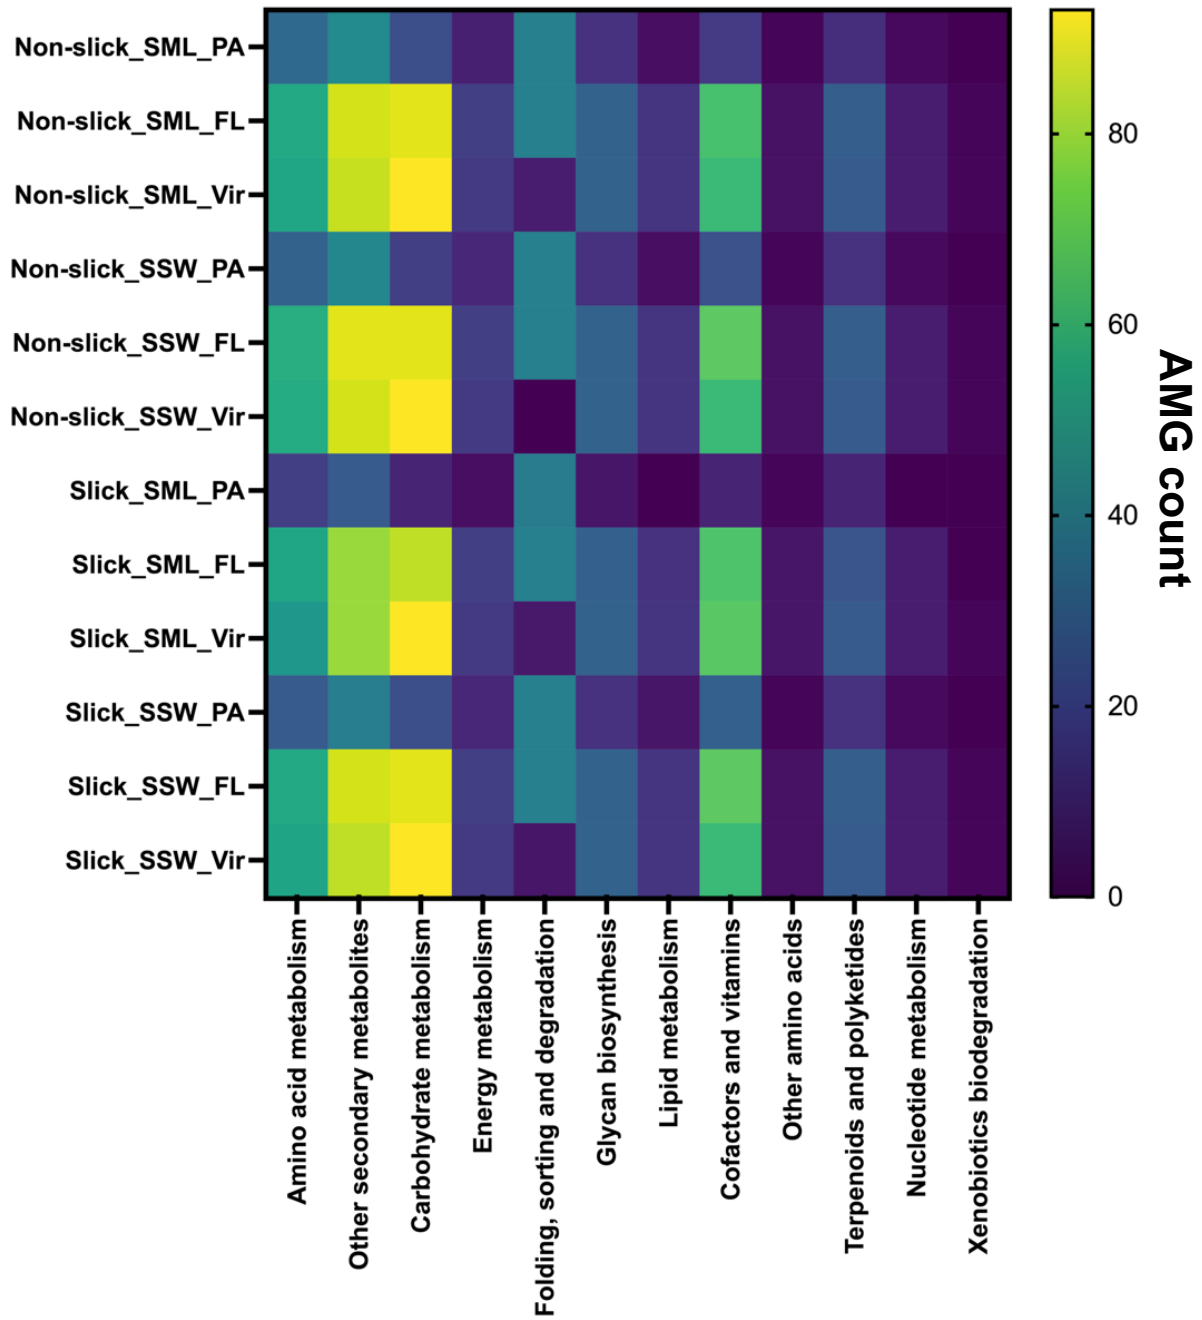

**Fig. S12:** Number of viral auxiliary metabolic genes towards a certain metabolic pathway without consideration of viral coverage. FL=free-living fraction (5-0.2  $\mu\text{m}$  pore size filtered), PA=particle-associated fraction ( $> 5 \mu\text{m}$  filtered), SML=sea-surface microlayer, SSW=subsurface water ( $\sim 70 \text{ cm}$  depth)

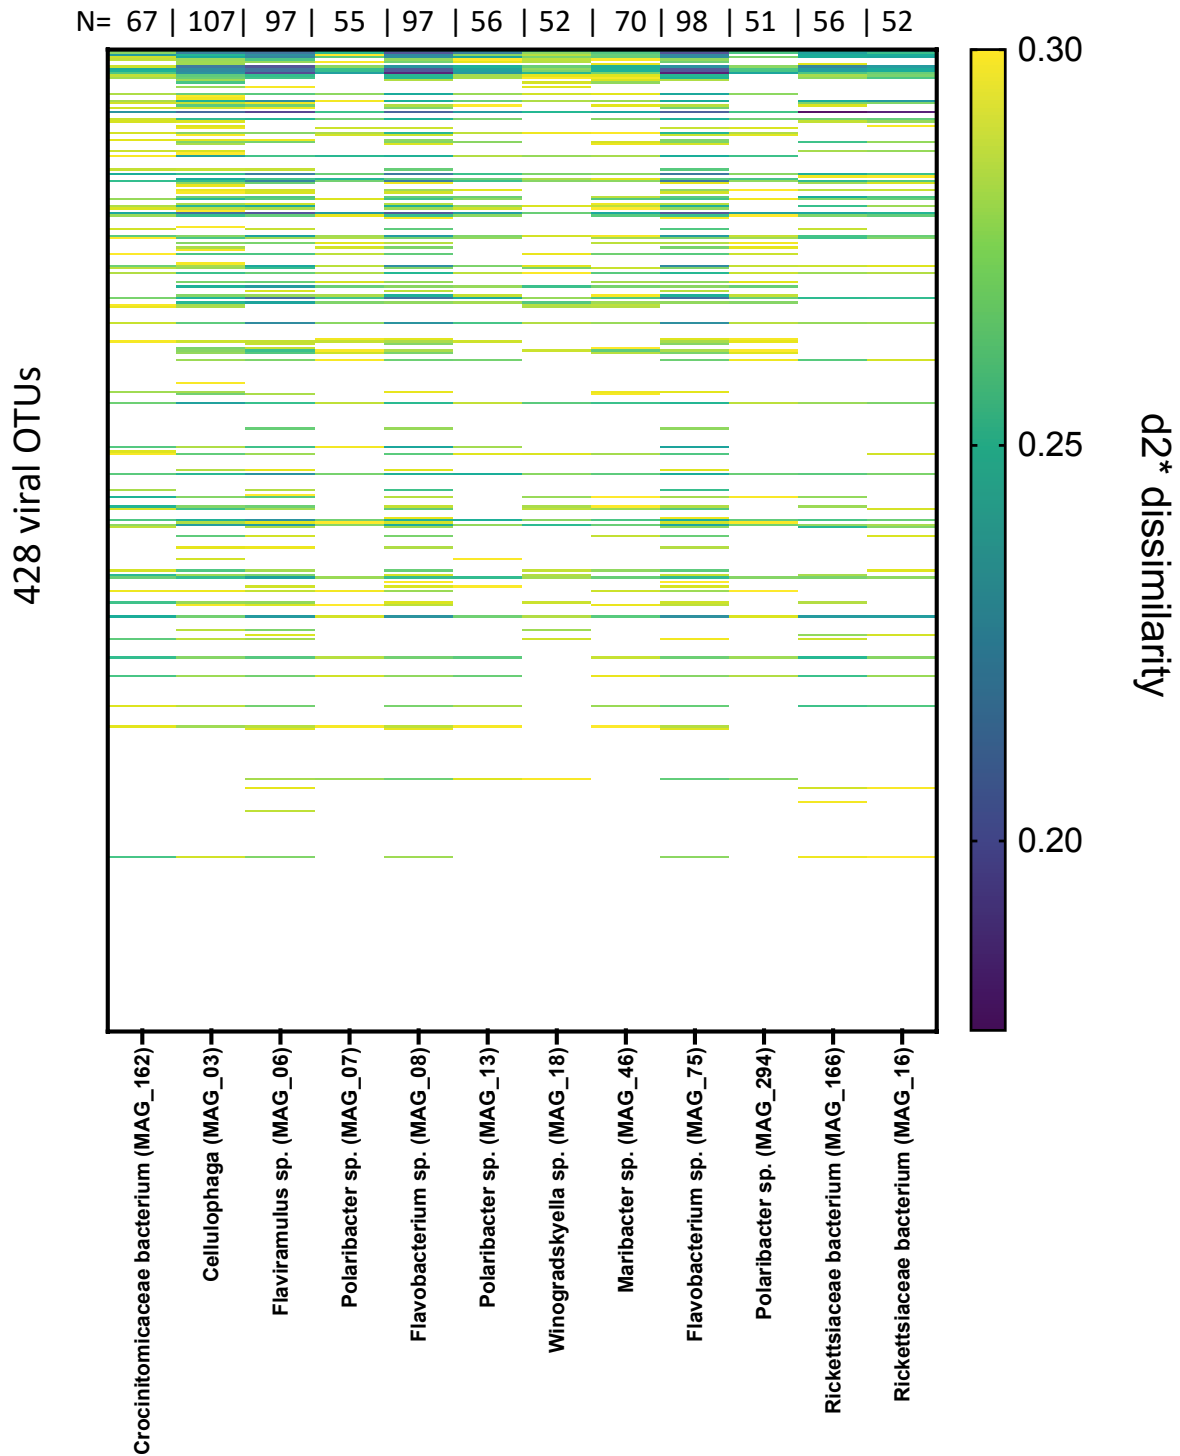

**Fig. S13:** Virus-host interactions based on *k*-mer frequency patterns. Shown are the top 12 host with most *k*-mer matches to viruses below the *d2\** threshold of 0.3. Host belonging to orders Flavobacteriales (class Bacteroidia) and Rickettsiales (class Alphaproteobacteria) had most matches with recovered vOTUs. *N* gives the number of virus-host matches for a metagenome-assembled genome (MAG).

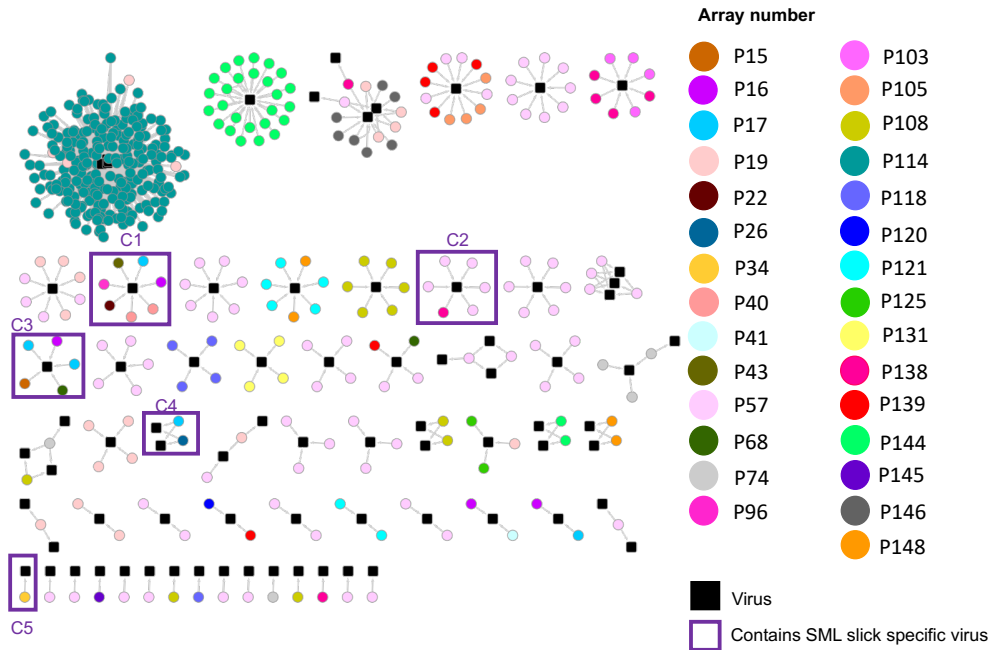

**Fig. S14:** Network of CRISPR-spacer to protospacer matches (100% similarity), colored according to CRISPR array the spacer stems from. Purple frames and letters C1- C5 indicate interaction cluster with involvement of viruses only detected in slick SML based on read mapping. Information on spacers matching vOTUs in C1-C5 is given in Table S10.

## References:

- 1 Enav, H., Béja, O. & Mandel-Gutfreund, Y. Cyanophage tRNAs may have a role in cross-infectivity of oceanic *Prochlorococcus* and *Synechococcus* hosts. *ISME J* **6**, 619-628, (2012).
- 2 Brettar, I., Christen, R. & Höfle, M. G. *Rheinheimera baltica* gen. nov., sp. nov., a blue-coloured bacterium isolated from the central Baltic Sea. *Int J Syst Evol Microbiol* **52**, 1851-1857, (2002).
- 3 Couvin, D. *et al.* CRISPRCasFinder, an update of CRISRFinder, includes a portable version, enhanced performance and integrates search for Cas proteins. *Nucleic Acids Res* **46**, W246-W251, (2018).
- 4 Thomas, T. *et al.* Analysis of the *Pseudoalteromonas tunicata* genome reveals properties of a surface-associated life style in the marine environment. *PLoS One* **3**, e3252, (2008).
- 5 Zhang, X. & An, X. Adaptation by Type III CRISPR-Cas Systems: Breakthrough Findings and Open Questions. *Front Microbiol* **13**, 876174, (2022).
- 6 Makarova, K. S. *et al.* Evolutionary classification of CRISPR-Cas systems: a burst of class 2 and derived variants. *Nat Rev Microbiol* **18**, 67-83, (2020).
- 7 Richter, M., Rossello-Mora, R., Oliver Glockner, F. & Peplies, J. JSpeciesWS: a web server for prokaryotic species circumscription based on pairwise genome comparison. *Bioinformatics* **32**, 929-931, (2016).
- 8 Chaumeil, P. A., Mussig, A. J., Hugenholtz, P. & Parks, D. H. GTDB-Tk: a toolkit to classify genomes with the Genome Taxonomy Database. *Bioinformatics*, (2019).
- 9 Matsen, F. A., Kodner, R. B. & Armbrust, E. V. pplacer: linear time maximum-likelihood and Bayesian phylogenetic placement of sequences onto a fixed reference tree. *BMC Bioinformatics* **11**, 538, (2010).
- 10 Huson, D. H. & Scornavacca, C. Dendroscope 3: an interactive tool for rooted phylogenetic trees and networks. *Syst Biol* **61**, 1061-1067, (2012).
- 11 Rambaut, A. Figtree Software (v. 1.4. 4). (2018).
- 12 Hoetzing, M. *et al.* Dynamics of Baltic Sea phages driven by environmental changes. *Environ Microbiol* **23**, 4576-4594, (2021).
- 13 Chaudhari, H. V., Inamdar, M. M. & Kondabagil, K. Scaling relation between genome length and particle size of viruses provides insights into viral life history. *iScience* **24**, 102452, (2021).
